# Supplementary material for: Eu2Pt3Pb5 and SrPt2Pb4—lead-based intermetallics with Y2Rh3Sn5/NdRh2Sn4-type polyanionic platinum–lead 3D frameworks
Source: Royal Society of Chemistry journal article supplement (doi:10.1039/d4dt03293d), 2024-12-17
Supplement: d4dt03293d1.pdf [file d4dt03293d1.pdf]

Electronic Supporting Information (ESI) for

**Eu<sub>2</sub>Pt<sub>3</sub>Pb<sub>5</sub> and SrPt<sub>2</sub>Pb<sub>4</sub> — lead-based intermetallics**

**with Y<sub>2</sub>Rh<sub>3</sub>Sn<sub>5</sub> / NdRh<sub>2</sub>Sn<sub>4</sub>-type polyanionic**

**platinum-lead 3D frameworks**

*Anastasiia Yu. Makhaneva,<sup>a</sup> Elena Yu. Zakharova,<sup>a</sup> Sergey N. Nesterenko,<sup>a</sup> Sergey M. Kazakov,<sup>a</sup> Konstantin A. Lyssenko,<sup>a,‡</sup> Andrey N. Azarevich,<sup>c</sup> Alexey V. Bogach,<sup>c</sup> Alexey N. Kuznetsov<sup>a,\*</sup>*

<sup>a</sup> *Department of Chemistry, Lomonosov Moscow State University, Leninskie Gory 1-3, 119991 Moscow, Russia*

<sup>b</sup> *National Research University Higher School of Economics, Miasnitskaya Str. 20, 101000 Moscow, Russia*

<sup>c</sup> *A.M Prokhorov General Physics Institute, Russian Academy of Sciences, Vavilova Str. 38, 119333, Moscow, Russia*

\* Corresponding author

email: [alexei@inorg.chem.msu.ru](mailto:alexei@inorg.chem.msu.ru)

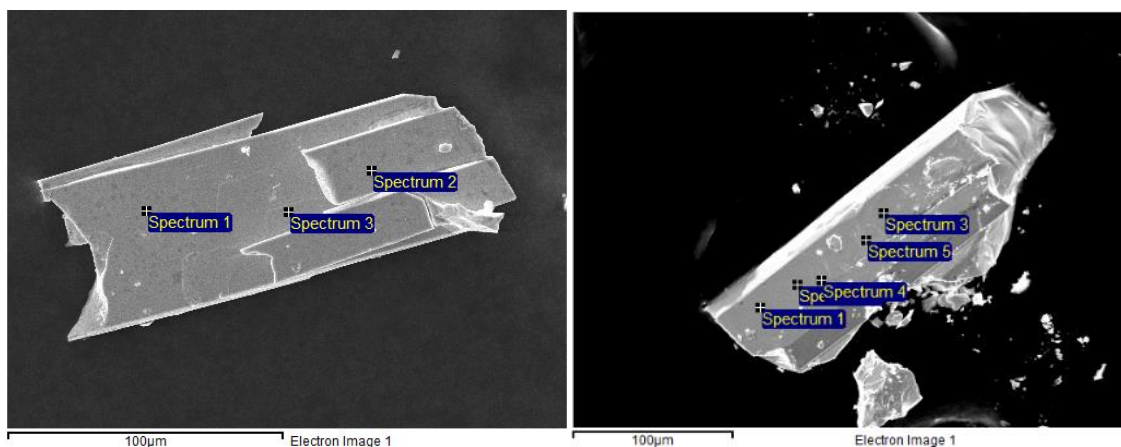

**Figure S1.** SEM image of the  $\text{Eu}_2\text{Pt}_3\text{Pb}_5$  (left) and  $\text{SrPt}_2\text{Pb}_4$  (right) crystals with analysis points marked.

**Table S1.** Averaged results of the EDX analysis of the  $\text{Eu}_2\text{Pt}_3\text{Pb}_5$  and  $\text{SrPt}_2\text{Pb}_4$  crystals.

| System   | Element | measurement by <i>ED</i> -spectrometer<br>(atomic %) |                   |       |       | Average formula                                            |
|----------|---------|------------------------------------------------------|-------------------|-------|-------|------------------------------------------------------------|
|          |         | Mean                                                 | Std.<br>deviation | Max.  | Min.  |                                                            |
| Eu-Pt-Pb | Eu      | 20.03                                                | 0.92              | 20.87 | 18.70 | $\text{Eu}_{2.00(9)}\text{Pt}_{2.99(5)}\text{P}_{5.00(7)}$ |
|          | Pt      | 29.93                                                | 0.50              | 30.43 | 29.13 |                                                            |
|          | Pb      | 50.05                                                | 0.74              | 50.97 | 48.97 |                                                            |
| Sr-Pt-Pb | Sr      | 14.99                                                | 0.31              | 15.24 | 14.23 | $\text{Sr}_{1.00(2)}\text{Pt}_{2.01(3)}\text{P}_{3.65(3)}$ |
|          | Pt      | 30.25                                                | 0.48              | 31.22 | 29.63 |                                                            |
|          | Pb      | 54.76                                                | 0.44              | 54.05 | 55.49 |                                                            |

**Table S2.** Anisotropic displacement parameters for  $\text{Eu}_2\text{Pt}_3\text{Pb}_5$  and  $\text{SrPt}_2\text{Pb}_4$ .

| $\text{Eu}_2\text{Pt}_3\text{Pb}_5$ |            |            |            |             |          |          |
|-------------------------------------|------------|------------|------------|-------------|----------|----------|
| <i>Atom</i>                         | $U_{11}$   | $U_{22}$   | $U_{33}$   | $U_{12}$    | $U_{13}$ | $U_{23}$ |
| Pt1                                 | 0.0095(10) | 0.0060(9)  | 0.0133(11) | 0.0005(7)   | 0.0000   | 0.0000   |
| Pt2                                 | 0.0081(8)  | 0.0042(8)  | 0.0157(10) | -0.0012(8)  | 0.0000   | 0.0000   |
| Pt3                                 | 0.0093(10) | 0.0051(8)  | 0.0148(10) | -0.0004(7)  | 0.0000   | 0.0000   |
| Eu1                                 | 0.0102(10) | 0.0055(10) | 0.0147(12) | -0.0004(10) | 0.0000   | 0.0000   |
| Eu2                                 | 0.0085(11) | 0.0051(10) | 0.0144(14) | -0.0030(9)  | 0.0000   | 0.0000   |
| Pb1                                 | 0.0082(10) | 0.0036(9)  | 0.0149(9)  | -0.0005(7)  | 0.0000   | 0.0000   |
| Pb2                                 | 0.0122(10) | 0.0077(9)  | 0.0161(9)  | -0.0001(7)  | 0.0000   | 0.0000   |
| Pb3                                 | 0.0086(9)  | 0.0038(8)  | 0.0157(10) | 0.0005(6)   | 0.0000   | 0.0000   |
| Pb4                                 | 0.0118(9)  | 0.0033(7)  | 0.0143(11) | -0.0007(7)  | 0.0000   | 0.0000   |
| Pb5                                 | 0.0088(9)  | 0.0051(8)  | 0.0128(9)  | 0.0004(6)   | 0.0000   | 0.0000   |
| $\text{SrPt}_2\text{Pb}_4$          |            |            |            |             |          |          |

| <i>Atom</i> | $U_{11}$   | $U_{22}$   | $U_{33}$   | $U_{12}$ | $U_{13}$   | $U_{23}$ |
|-------------|------------|------------|------------|----------|------------|----------|
| Pb1         | 0.0149(6)  | 0.0141(6)  | 0.0078(6)  | 0.0000   | 0.0003(5)  | 0.0000   |
| Pb2         | 0.0135(6)  | 0.0150(6)  | 0.0097(6)  | 0.0000   | 0.0004(5)  | 0.0000   |
| Pb3         | 0.0146(6)  | 0.0142(6)  | 0.0084(6)  | 0.0000   | 0.0007(5)  | 0.0000   |
| Pb4         | 0.0195(7)  | 0.0215(7)  | 0.0156(7)  | 0.0000   | 0.0004(5)  | 0.0000   |
| Pt1         | 0.0204(7)  | 0.0145(6)  | 0.0098(7)  | 0.0000   | -0.0011(5) | 0.0000   |
| Pt2         | 0.0196(7)  | 0.0153(6)  | 0.0110(7)  | 0.0000   | -0.0016(5) | 0.0000   |
| Sr          | 0.0125(15) | 0.0126(14) | 0.0097(14) | 0.0000   | 0.0028(12) | 0.0000   |

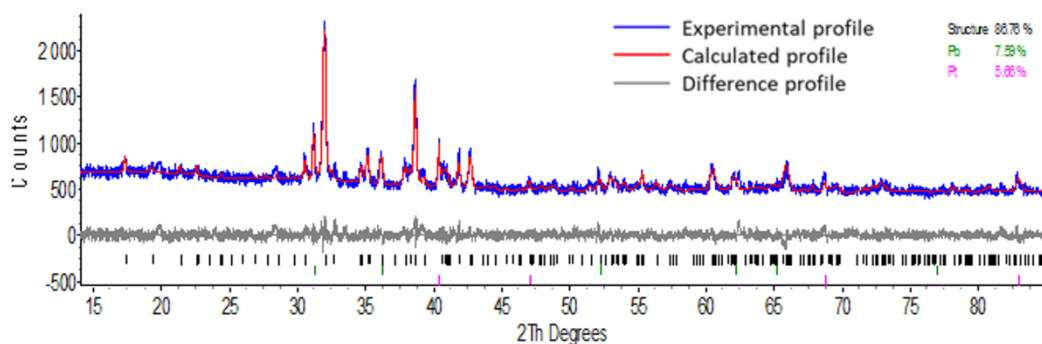

**Figure S2.** Observed, calculated, and difference Rietveld plots for the sample  $\text{Eu}_2\text{Pt}_3\text{Pb}_5$ .

**Table S3.** Data collection and Rietveld analysis parameters, and final residuals for  $\text{Eu}_2\text{Pt}_3\text{Pb}_5$

| Compound                    | $\text{Eu}_2\text{Pt}_3\text{Pb}_5$ |
|-----------------------------|-------------------------------------|
| T, K                        | 293                                 |
| Space group                 | $Cmc2_1$                            |
| $a$ , Å                     | 4.6430(9)                           |
| $b$ , Å                     | 27.204(5)                           |
| $c$ , Å                     | 7.562(2)                            |
| $V$ , Å <sup>3</sup>        | 962.1(3)                            |
| $Z$                         | 4                                   |
| Range in $2\theta$ , °      | 15-85                               |
| $\rho$ , g cm <sup>-3</sup> | 13.291(5)                           |
| $R_{\text{Bragg}}$          | 0.022                               |
| $R_p$                       | 0.046                               |
| $R_{\text{wp}}$             | 0.060                               |
| GoF                         | 1.45                                |

**Table S4.** Fractional atomic coordinates and isotropic displacement parameters for  $\text{Eu}_2\text{Pt}_3\text{Pb}_5$  (polycrystalline sample).

| Atom | Wickoff site | x/a | y/b       | z/c | $B_{\text{eq}}$ |
|------|--------------|-----|-----------|-----|-----------------|
| Pt1  | 4a           | 0.5 | 0.5439(7) | 1   | 0.75(1)         |
| Pb1  | 4a           | 0   | 0.7139(6) | 0   | 0.702(7)        |
| Eu1  | 4a           | 0.5 | 0.6699(8) | 1   | 0.805(5)        |
| Eu2  | 4a           | 1   | 0.5195(6) | 0   | 0.742(7)        |
| Pb2  | 4a           | 1   | 0.7009(5) | 0   | 0.955(8)        |
| Pb3  | 4a           | 0.5 | 0.4524(7) | 1   | 0.734(8)        |
| Pt2  | 4a           | 0.5 | 0.7169(5) | 0   | 0.734(8)        |
| Pb4  | 4a           | 0.5 | 0.6174(4) | 0   | 0.765(9)        |
| Pt3  | 4a           | 1   | 0.6012(6) | 0   | 0.773(8)        |
| Pb5  | 4a           | 1   | 0.6001(6) | 1   | 0.710(6)        |

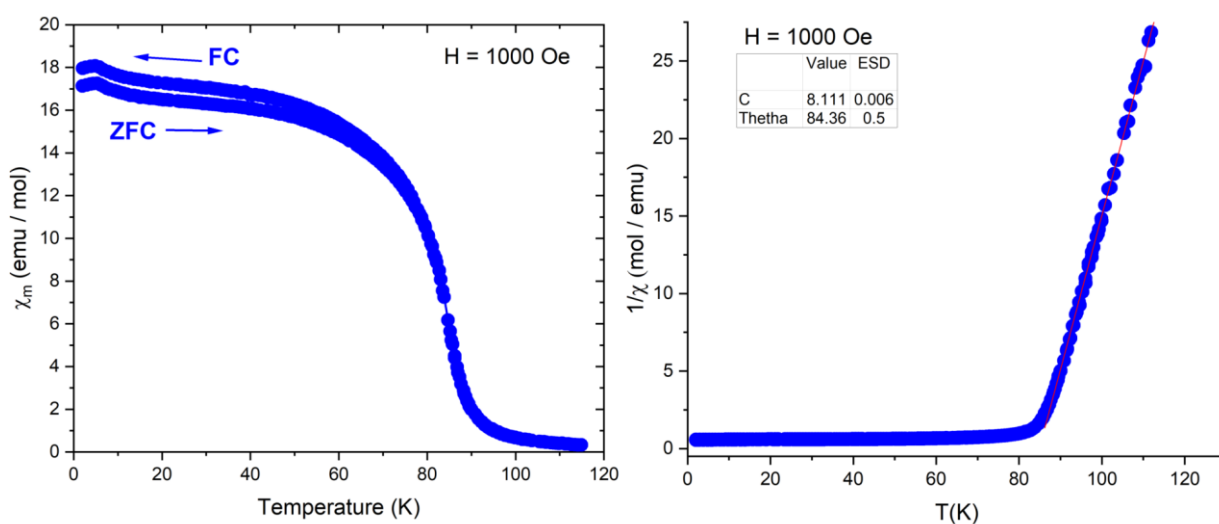

**Figure S3.** The temperature dependences of molar magnetic susceptibility (left) of  $\text{Eu}_2\text{Pt}_3\text{Pb}_5$  and inverse magnetic susceptibility (right) in the magnetic field of 1000 Oe. The parameters of the Curie-Weiss fit are plotted in the inset table in the inverse magnetization plot.
